# Supplementary material
Source: Copernicus journal article supplement (doi:10.5194/essd-2026-236)
Supplement: Supplementary file 1 [file essd-2026-236-supplement.pdf]

1 **Supplementary information**

2

3 **Table S1: Geographical division of the world used to identify extreme fire events (EFEs). These regions or modified continental**  
 4 **biomes (MCBs) were obtained by splitting global biomes into the different continents, plus some additional modifications.**

| <b>region_ID</b> | <b>Continental biomes that are part of the region</b>                                                                                                                                                        |
|------------------|--------------------------------------------------------------------------------------------------------------------------------------------------------------------------------------------------------------|
| 1                | Africa-Deserts & Xeric Shrublands (northern hemisphere only)                                                                                                                                                 |
| 2                | Africa-Deserts & Xeric Shrublands (southern hemisphere only)                                                                                                                                                 |
| 3                | Africa-Flooded Grasslands & Savannas                                                                                                                                                                         |
| 4                | Africa-Mediterranean Forests, Woodlands & Scrub (southern hemisphere only)                                                                                                                                   |
| 5                | Africa-Montane Grasslands & Shrublands                                                                                                                                                                       |
| 6                | Africa-Temperate Broadleaf & Mixed Forests                                                                                                                                                                   |
| 7                | Africa-Tropical & Subtropical Dry Broadleaf Forests                                                                                                                                                          |
| 8                | Africa-Tropical & Subtropical Grasslands, Savannas & Shrublands (northern hemisphere only)                                                                                                                   |
| 9                | Africa-Tropical & Subtropical Grasslands, Savannas & Shrublands (southern hemisphere only)                                                                                                                   |
| 10               | Africa-Tropical & Subtropical Moist Broadleaf Forests                                                                                                                                                        |
| 11               | Asia-Boreal Forests/Taiga                                                                                                                                                                                    |
| 12               | Asia-Deserts & Xeric Shrublands                                                                                                                                                                              |
| 13               | Asia-Flooded Grasslands & Savannas                                                                                                                                                                           |
| 14               | Asia-Montane Grasslands & Shrublands                                                                                                                                                                         |
| 15               | Asia-Temperate Broadleaf & Mixed Forests                                                                                                                                                                     |
| 16               | Asia-Temperate Conifer Forests                                                                                                                                                                               |
| 17               | Asia-Temperate Grasslands, Savannas & Shrublands                                                                                                                                                             |
| 18               | Asia-Tropical & Subtropical Dry Broadleaf Forests                                                                                                                                                            |
| 19               | Asia-Tropical & Subtropical Moist Broadleaf Forests; Asia-Mangroves; Asia-Tropical & Subtropical Grasslands, Savannas & Shrublands                                                                           |
| 20               | Asia-Tundra                                                                                                                                                                                                  |
| 21               | Africa-Mediterranean Forests, Woodlands & Scrub (northern hemisphere only); Asia-Mediterranean Forests, Woodlands & Scrub; Europe-Mediterranean Forests, Woodlands & Scrub; Africa-Temperate Conifer Forests |
| 22               | Europe-Boreal Forests/Taiga                                                                                                                                                                                  |
| 23               | Europe-Temperate Broadleaf & Mixed Forests                                                                                                                                                                   |
| 24               | Europe-Temperate Conifer Forests                                                                                                                                                                             |
| 25               | Europe-Temperate Grasslands, Savannas & Shrublands                                                                                                                                                           |
| 26               | Europe-Tundra                                                                                                                                                                                                |
| 27               | North America-Boreal Forests/Taiga                                                                                                                                                                           |
| 28               | North America-Deserts & Xeric Shrublands                                                                                                                                                                     |
| 29               | North America-Mediterranean Forests, Woodlands & Scrub                                                                                                                                                       |
| 30               | North America-Temperate Broadleaf & Mixed Forests                                                                                                                                                            |

|    |                                                                                                                                                                                                      |
|----|------------------------------------------------------------------------------------------------------------------------------------------------------------------------------------------------------|
| 31 | North America-Temperate Conifer Forests                                                                                                                                                              |
| 32 | North America-Temperate Grasslands, Savannas & Shrublands                                                                                                                                            |
| 33 | North America-Tropical & Subtropical Coniferous Forests                                                                                                                                              |
| 34 | North America-Tropical & Subtropical Dry Broadleaf Forests                                                                                                                                           |
| 35 | North America-Tropical & Subtropical Grasslands, Savannas & Shrublands                                                                                                                               |
| 36 | North America-Tropical & Subtropical Moist Broadleaf Forests                                                                                                                                         |
| 37 | North America-Tundra                                                                                                                                                                                 |
| 38 | Australia-Oceania-Deserts & Xeric Shrublands                                                                                                                                                         |
| 39 | Australia-Oceania-Mediterranean Forests, Woodlands & Scrub                                                                                                                                           |
| 40 | Australia-Oceania-Montane Grasslands & Shrublands                                                                                                                                                    |
| 41 | Australia-Temperate Broadleaf & Mixed Forests; Australia-Montane Grasslands & Shrublands;<br>Oceania-Temperate Broadleaf & Mixed Forests                                                             |
| 42 | Australia-Temperate Grasslands, Savannas & Shrublands                                                                                                                                                |
| 43 | Australia-Oceania-Tropical & Subtropical Dry Broadleaf Forests                                                                                                                                       |
| 44 | Australia-Tropical & Subtropical Grasslands, Savannas & Shrublands; Australia-Tropical &<br>Subtropical Moist Broadleaf Forests; Oceania-Tropical & Subtropical Grasslands, Savannas &<br>Shrublands |
| 45 | Australia-Oceania-Tropical & Subtropical Moist Broadleaf Forests                                                                                                                                     |
| 46 | South America-Deserts & Xeric Shrublands                                                                                                                                                             |
| 47 | South America-Flooded Grasslands & Savannas                                                                                                                                                          |
| 48 | South America-Mediterranean Forests, Woodlands & Scrub                                                                                                                                               |
| 49 | South America-Montane Grasslands & Shrublands                                                                                                                                                        |
| 50 | South America-Temperate Broadleaf & Mixed Forests                                                                                                                                                    |
| 51 | South America-Temperate Grasslands, Savannas & Shrublands                                                                                                                                            |
| 52 | South America-Tropical & Subtropical Dry Broadleaf Forests                                                                                                                                           |
| 53 | South America-Tropical & Subtropical Grasslands, Savannas & Shrublands-Southern<br>Hemisphere                                                                                                        |
| 54 | South America-Tropical & Subtropical Grasslands, Savannas & Shrublands-Northern<br>Hemisphere                                                                                                        |
| 55 | South America-Tropical & Subtropical Moist Broadleaf Forests                                                                                                                                         |

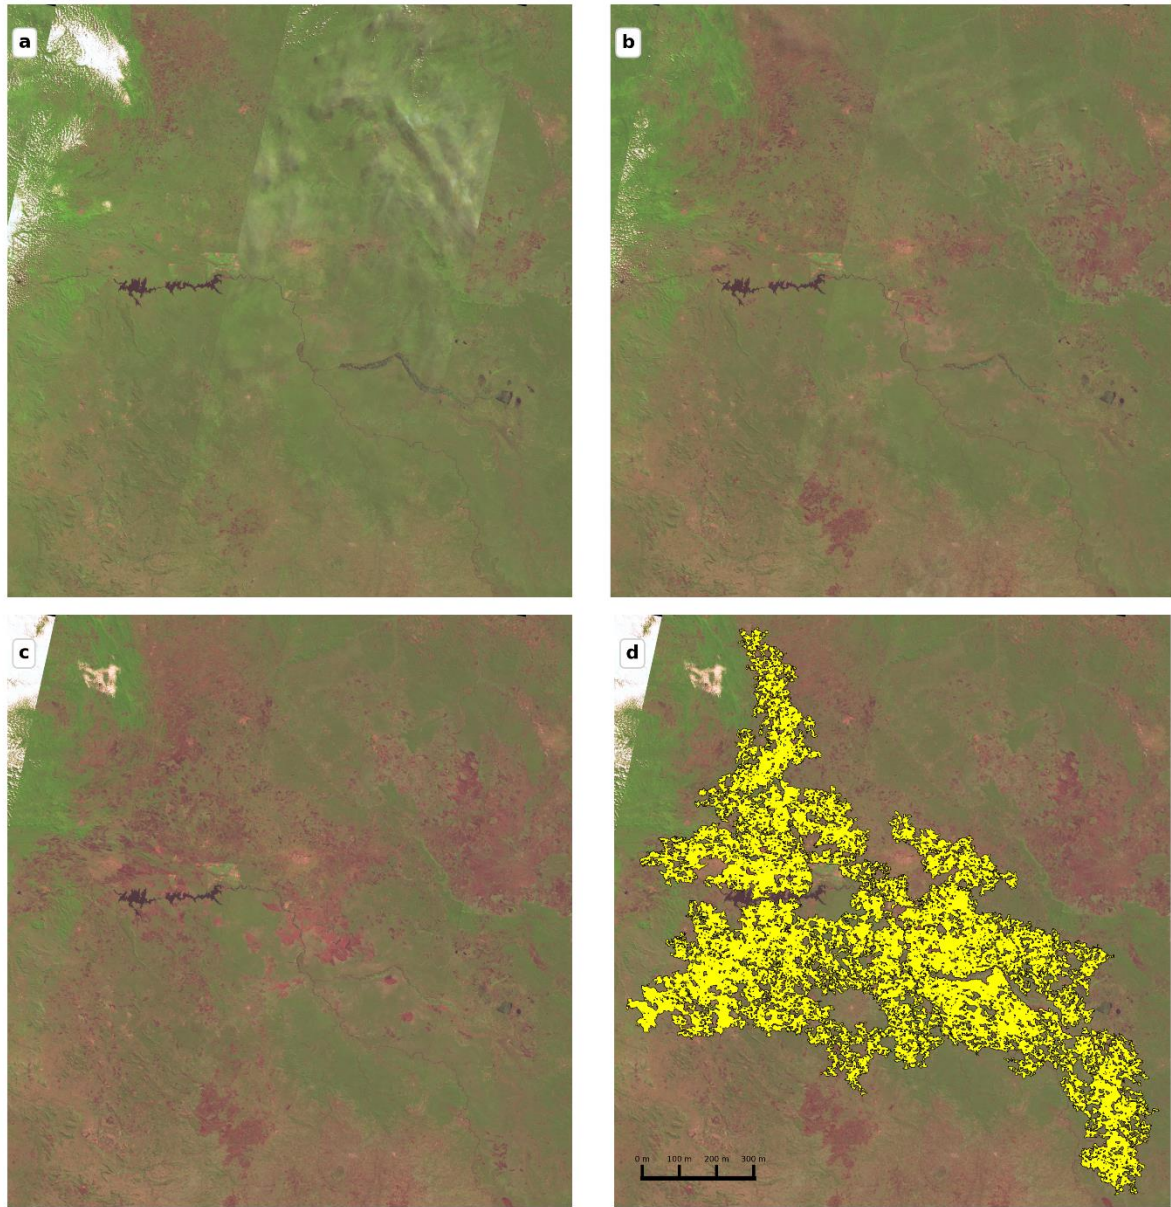

5

6 **Figure S1: Satellite images and integration of fire events in the FRY database. Dark reddish-purple color shows the fire scars in all**  
7 **images. Image (a) shows a Landsat image from 14 May 2020 with few fire scars. Image (b), from 30 May 2020, shows a greater**  
8 **number of fires and more extensive burned areas. Image (c), from 15 June 2020, shows further expansion of the fire. Image (d)**  
9 **corresponds to a polygon from the FRY database (cut-off value of 12 days) that integrates all fires visible in images (a)-(c) as a single**  
10 **event, and its duration in the FRY database is from 24 April to 15 September, 2020, highlighting a limitation of the algorithm, as it**  
11 **can group together different fires that occurred several days apart into a single polygon.**

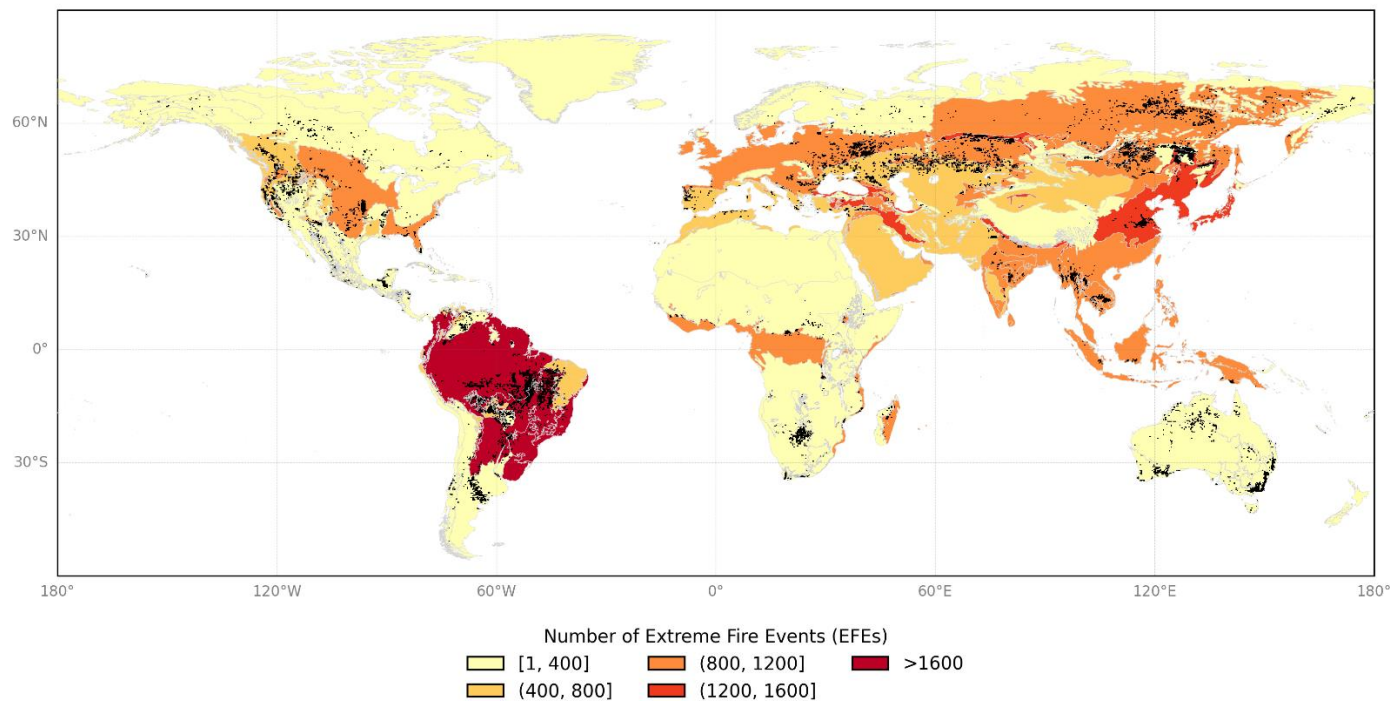

13

14 **Figure S2: Spatial distribution of the total number of extreme fire events (EFEs) accumulated by modified continental biome**  
 15 **(MCBs) at the global scale during the period 2003-2022. The color of each MCB represents the total number of EFEs recorded**  
 16 **within that region, grouped into intervals of increasing frequency. The black dots indicate the location of the grid cells where EFEs**  
 17 **were identified within each MCB.**

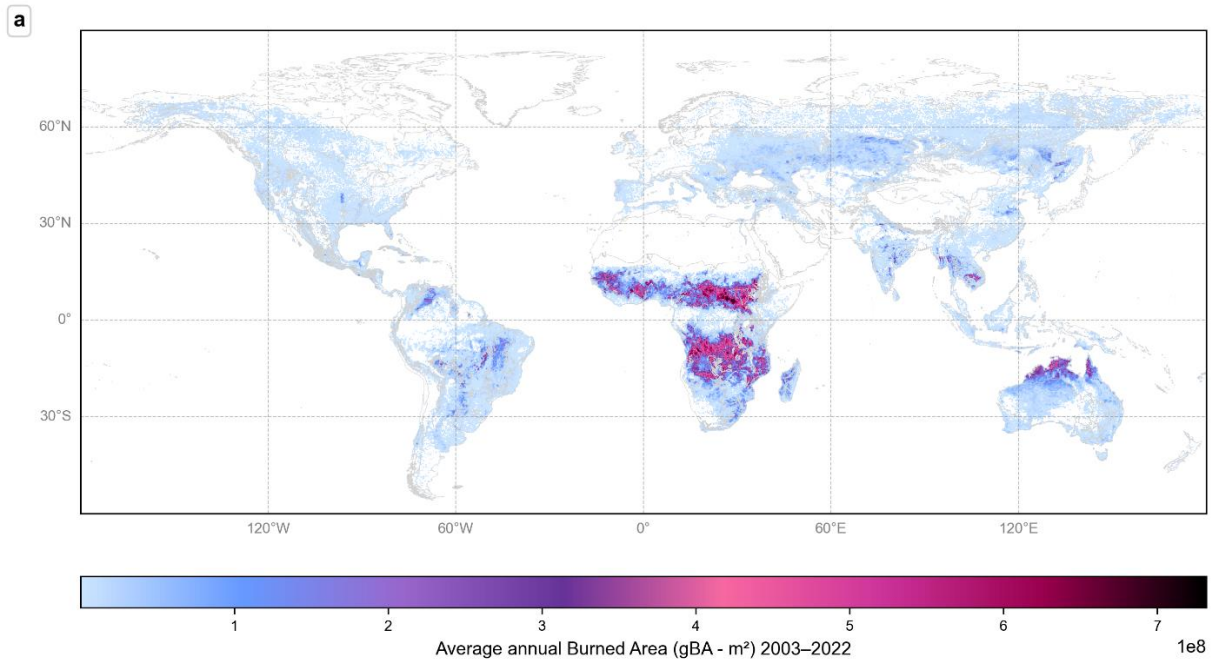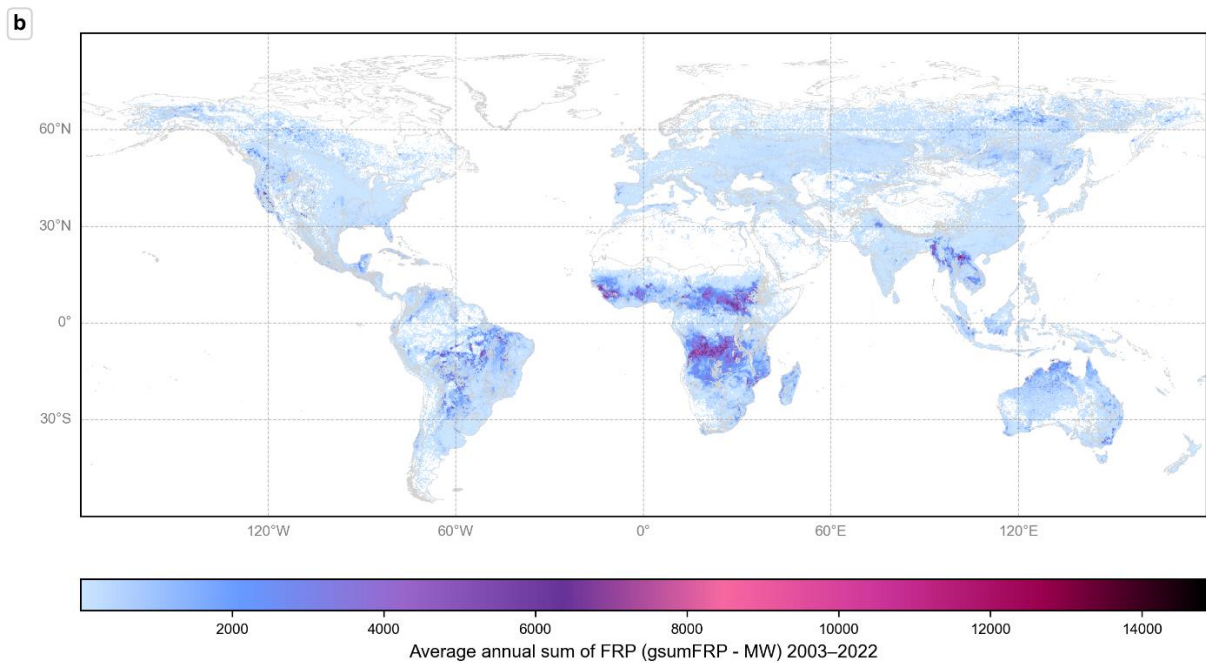

18

19 **Figure S3: Spatial distribution of the average annual Burned Area – BA (panel a) and sum of FRP (panel b) over the period 2003-**  
 20 **2022. Cell-month events (CMEs) with recurrent extreme fire events (EFEs) tend to show higher average BA and sum of FRP,**  
 21 **reflecting greater fire activity.**

## Region ID 5: Africa-Montane Grasslands &amp; Shrublands

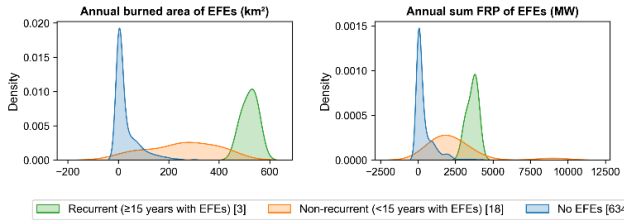

## Region ID 10: Africa-Tropical &amp; Subtropical Moist Broadleaf Forests

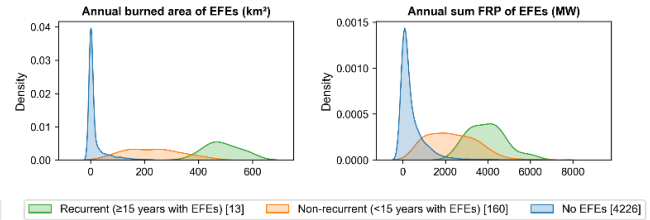

## Region ID 12: Asia-Deserts &amp; Xeric Shrubland

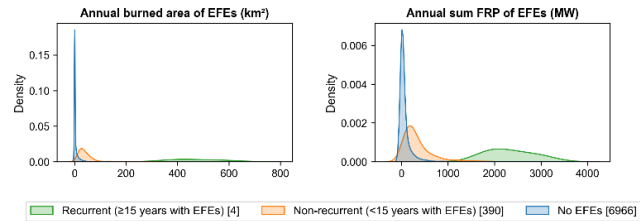

## Region ID 18: Asia-Tropical &amp; Subtropical Dry Broadleaf Forests

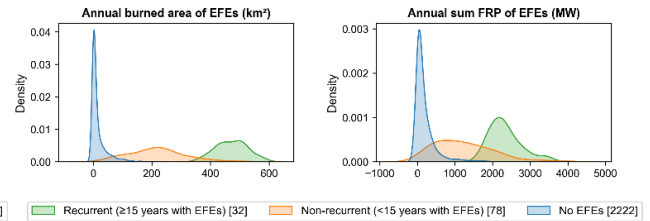

## Region ID 19: Asia-Tropical &amp; Subtropical Moist Broadleaf Forests; Asia-Mangroves; Asia-Tropical &amp; Subtropical Grasslands, Savannas &amp; Shrublands

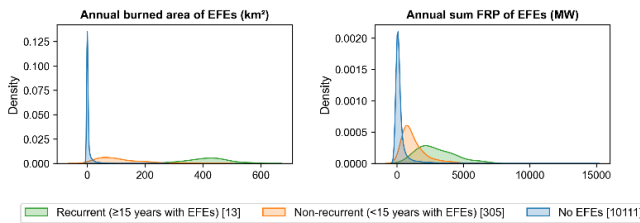

## Region ID 21: Eurafasia-Mediterranean Forests, Woodlands &amp; Scrub

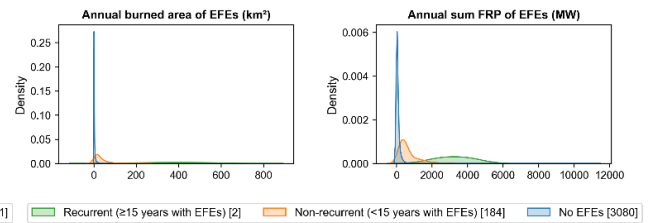

## Region ID 32: North America-Temperate Grasslands, Savannas &amp; Shrublands

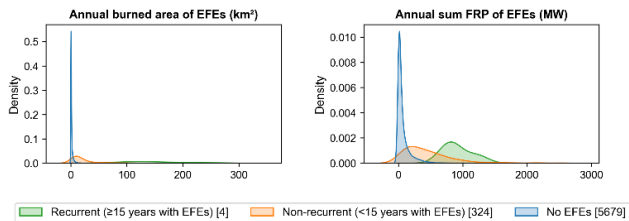

## Region ID 53: South America-Tropical &amp; Subtropical Grasslands, Savannas &amp; Shrublands-Southern Hemisphere

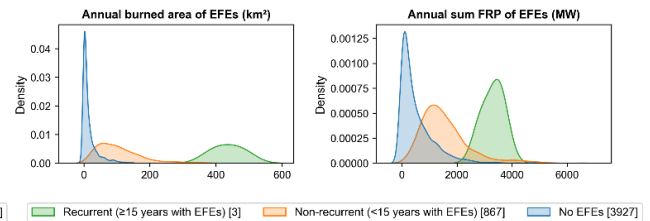

## Region ID 55: South America-Tropical &amp; Subtropical Moist Broadleaf Forests

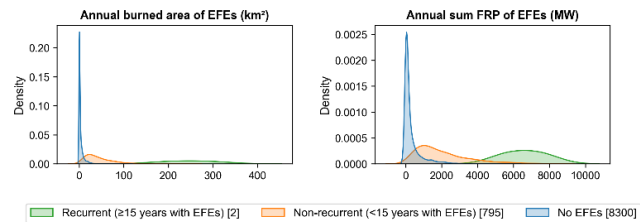

24 **Figure S4:** Each subplot shows, for each modified continental biome (MCB) containing recurrent extreme fire events (EFEs), the  
25 distribution (kernel density estimate) of annual burned area (left panels) and annual sumFRP (right panels). EFEs are defined based  
26 on the gBA+gsumFRP criterion. CMEs are grouped into those with recurrent EFEs (green; at least 15 years with EFEs), non-  
27 recurrent EFEs (orange; EFEs in at least one but fewer than 15 years), and no EFEs (blue). Distributions are normalised  
28 independently to ensure visibility of groups with fewer data points. The number of CMEs in each group is indicated in brackets in  
29 the legend.

**Region ID 5: Africa-Montane Grasslands & Shrublands**

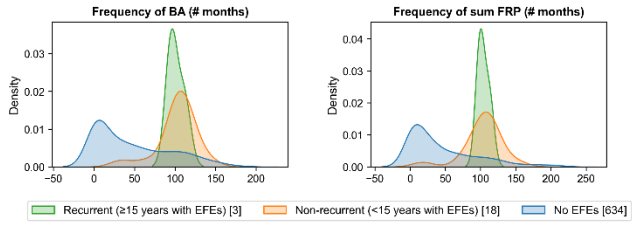

**Region ID 10: Africa-Tropical & Subtropical Moist Broadleaf Forests**

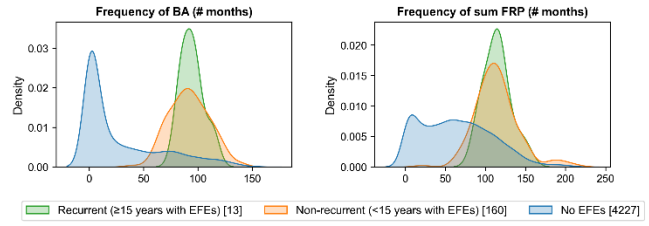

**Region ID 12: Asia-Deserts & Xeric Shrubland**

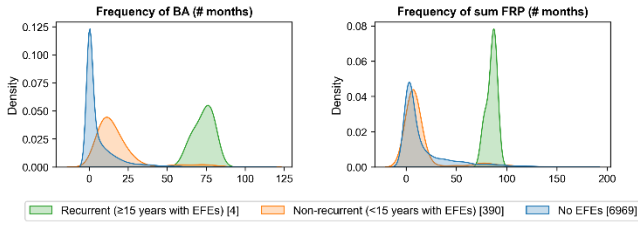

**Region ID 18: Asia-Tropical & Subtropical Dry Broadleaf Forests**

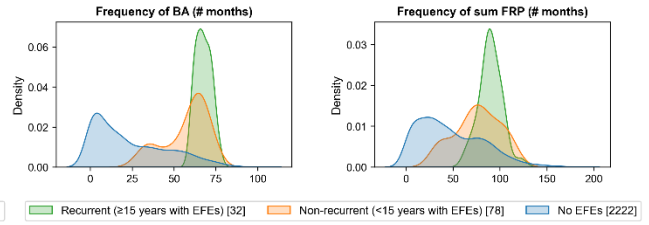

**Region ID 19: Asia-Tropical & Subtropical Moist Broadleaf Forests; Asia-Mangroves; Asia-Tropical & Subtropical Grasslands, Savannas & Shrublands**

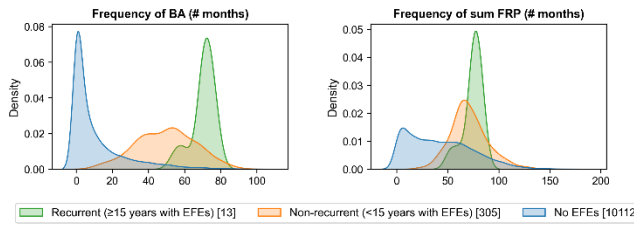

**Region ID 21: Eurasia-Mediterranean Forests, Woodlands & Scrub**

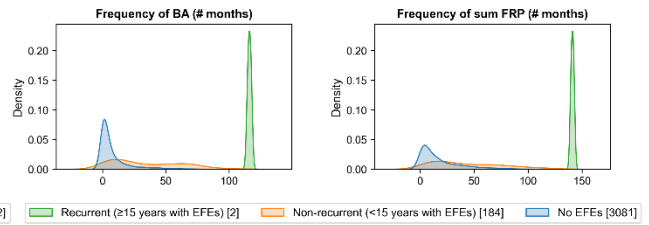

**Region ID 32: North America-Temperate Grasslands, Savannas & Shrublands**

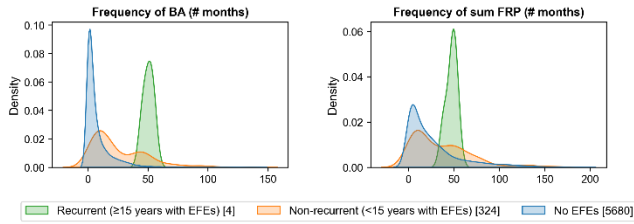

**Region ID 53: South America-Tropical & Subtropical Grasslands, Savannas & Shrublands-Southern Hemisphere**

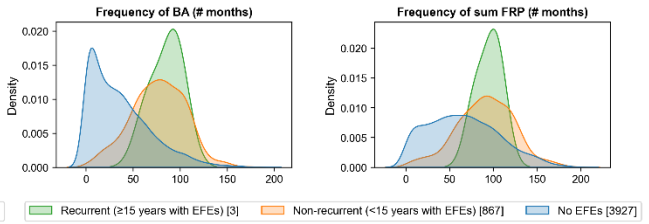

**Region ID 55: South America-Tropical & Subtropical Moist Broadleaf Forests**

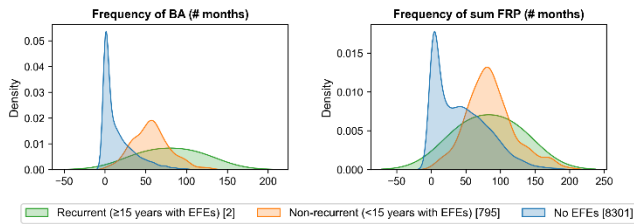

31 **Figure S5:** Each subplot shows, for each modified continental biome (MCB) recurrent extreme fire events (EFEs), the distribution  
 32 (kernel density estimate) of the number of months a CME presented fire activity in terms of annual burned area (left panels) and  
 33 annual sumFRP (right panels). EFEs are defined based on the gBA+gsumFRP criterion. CMEs are grouped into those with recurrent  
 34 EFEs (green; at least 15 years with EFEs), non-recurrent EFEs (orange; EFEs in at least one but fewer than 15 years), and no EFEs  
 35 (blue). Distributions are normalised independently to ensure visibility of groups with fewer data points. The number of CMEs in  
 36 each group is indicated in brackets in the legend.

37

38 **Table S2:** Extreme, large or catastrophic fire events identified in scientific literature and their detection in the extreme fire events  
 39 (EFEs) database. Eighteen of the twenty events were detected, including some of the most significant ones, which supports the  
 40 validity of the database for identifying extreme fires.

| Fire                                  | Year | Reference                                                                                                                                                          | Detected in EFES database | EFES detected (dates and regions)                                                                                                      |
|---------------------------------------|------|--------------------------------------------------------------------------------------------------------------------------------------------------------------------|---------------------------|----------------------------------------------------------------------------------------------------------------------------------------|
| 1. Algarve and central Portugal fires | 2003 | Exploring the occurrence of mega-fires in Portugal (Tedim et al., 2013).                                                                                           | Yes                       | July-September Mediterranean Forests (Region ID 21)                                                                                    |
| 2. Alaska                             | 2004 | Alaska's exceptional 2004 fire season (Shulski et al., 2005).                                                                                                      | Yes                       | July in Boreal Forests (region ID 27) and August 2004 in Tundra (region ID 37)                                                         |
| 3. Northwest Territories fires-Canada | 2014 | An Assessment of Surface and Atmospheric Conditions Associated with the Extreme 2014 Wildfire Season in Canada's Northwest Territories (Kochtubajda et al., 2019). | Yes                       | July and August, only Boreal Forests (region ID 27)                                                                                    |
| 4. British Columbia                   | 2017 | Attribution of the Influence of Human-Induced Climate Change on an Extreme Fire Season (Kirchmeier-Young et al., 2019).                                            | Yes                       | July-September in Boreal Forests (region ID 27) and June-September in Temperate Conifer Forests (region ID 31)                         |
| 5. Megafires in Chile                 | 2017 | Megafires in Chile 2017: Monitoring multiscale environmental impacts of burned ecosystems (De la Barrera et al., 2018).                                            | Yes                       | January and March in Mediterranean Forests (region ID 48). January to March 2017 in Temperate Broadleaf & Mixed Forests (region ID 50) |
| 6. Sierra de la Culebra- Spain        | 2022 | An integrated assessment of carbon emissions from forest fires beyond impacts on aboveground biomass. A                                                            | Yes                       | June and July in Mediterranean Forests (region ID 21)                                                                                  |

| <b>Fire</b>                                           | <b>Year</b> | <b>Reference</b>                                                                                                             | <b>Detected in EFES database</b> | <b>EFES detected (dates and regions)</b>                                                                                                                                                                   |
|-------------------------------------------------------|-------------|------------------------------------------------------------------------------------------------------------------------------|----------------------------------|------------------------------------------------------------------------------------------------------------------------------------------------------------------------------------------------------------|
|                                                       |             | showcase using airborne lidar and GEDI data over a megafire in Spain (Pascual and Guerra-Hernández, 2023).                   |                                  |                                                                                                                                                                                                            |
| 7. Camp- California                                   | 2018        | The fastest-growing and most destructive fires in the US (2001 to 2020) (Balch et al., 2024).                                | Yes                              | November in Mediterranean forest (region ID 29) and Temperate Conifer Forests (region ID 31)                                                                                                               |
| 8. Marshall- Colorado                                 | 2021        |                                                                                                                              | No                               | EFE not detected because the affected area was too small (2,400 ha), resulting in BA and sum of FRP anomalies below the detection threshold.                                                               |
| 9. Anderson Creek                                     | 2016        |                                                                                                                              | Yes                              | March in Temperate Grasslands, Savannas & Shrublands (Region ID 32)                                                                                                                                        |
| 10. Black summer Australia                            | 2019-2020   | What Do the Australian Black Summer Fires Signify for the Global Fire Crisis(Nolan et al., 2021).                            | Yes                              | September 2019-February 2020 in Temperate Broadleaf & Mixed Forests; Montane Grasslands & Shrublands (Region ID 41), Mediterranean Forests (Region ID 39) and Tropical & Subtropical region (Region ID 44) |
| 11. August Complex Fire California                    | 2020        | Megafires in a Warming World: What Wildfire Risk Factors Led to California's Largest Recorded Wildfire (Varga et al., 2022). | Yes                              | August-October in Temperate Conifer Forests (Region ID 31) and Mediterranean Forests (region ID 29)                                                                                                        |
| 12. Lena-Vilyui interfluve of Central Yakutia-Siberia | 2021        | The Impact of Catastrophic Forest Fires of 2021 on the Light Soils in Central Yakutia (Desyatkin et al., 2024).              | Yes                              | July-September in Boreal Forests/Taiga (region ID 11)                                                                                                                                                      |
| 13. Peloponnisos, Greece                              | 2007        | Fire behaviour of the large fires of 2007 in Greece (Athanasidou and Xanthopoulos, 2010).                                    | Yes                              | July-August in Mediterranean Forests (region ID 21)                                                                                                                                                        |

| <b>Fire</b>                                        | <b>Year</b> | <b>Reference</b>                                                                                                                    | <b>Detected in EFES database</b> | <b>EFES detected (dates and regions)</b>                                                                                                                                                                                                                               |
|----------------------------------------------------|-------------|-------------------------------------------------------------------------------------------------------------------------------------|----------------------------------|------------------------------------------------------------------------------------------------------------------------------------------------------------------------------------------------------------------------------------------------------------------------|
| 14. Mati, Greece                                   | 2018        | Forest Fire Analysis with Sentinel-2 Satellite Imagery: The Case of Mati (Greece) in 2018 (Bitek and Erenoğlu, 2022).               | No                               | EFE not detected because the affected area was too small (1,500 ha), resulting in BA and sum of FRP anomalies below the detection threshold.                                                                                                                           |
| 15. Black Saturday, Australia                      | 2009        | Anatomy of a catastrophic wildfire: The Black Saturday Kilmore East fire in Victoria, Australia (Cruz et al., 2012).                | Yes                              | February in Temperate Broadleaf & Mixed Forests; Montane Grasslands & Shrublands (Region ID 41),                                                                                                                                                                       |
| 16. Pedrógão Grande, Portugal                      | 2017        | Influence of Convectively Driven Flows in the Course of a Large Fire in Portugal: The Case of Pedrógão Grande (Pinto et al., 2022). | Yes                              | June Mediterranean Forests (region ID 21)                                                                                                                                                                                                                              |
| 17. Sumatra, Kalimantan, and West Papua, Indonesia | 2015        | Spatial evaluation of Indonesia's 2015 fire-affected area and estimated carbon emissions using Sentinel-1 (Lohberger et al., 2018). | Yes                              | July-August in Kalimantan, and September-October in West Papua/ Tropical & Subtropical Moist Broadleaf Forests (Region ID 19). No events detected in Sumatra.                                                                                                          |
| 18. Amazonia                                       | 2019        | Climate influence on the 2019 fires in Amazonia (Dong et al., 2021).                                                                | Yes                              | August-September in Flooded Grasslands & Savannas (region ID 47), Tropical & Subtropical Dry Broadleaf Forests (region ID 52), Tropical & Subtropical Grasslands, Savannas & Shrublands (region ID 53), Tropical & Subtropical Moist Broadleaf Forests (region ID 55). |
| 19. Siberian Taiga Fires (Russia)                  | 2003        | Satellite-derived 2003 wildfires in southern Siberia and their potential influence on carbon sequestration (Huang et al., 2009).    | Yes                              | May-June in Asia-Boreal Forests/Taiga (region ID 11), Temperate Broadleaf & Mixed Forests (region ID 15),                                                                                                                                                              |

| Fire                             | Year | Reference                                                                                                                | Detected in EFES database | EFES detected (dates and regions)                                                                        |
|----------------------------------|------|--------------------------------------------------------------------------------------------------------------------------|---------------------------|----------------------------------------------------------------------------------------------------------|
|                                  |      |                                                                                                                          |                           | Temperate Conifer Forests (region ID 16), Temperate Grasslands and Savannas & Shrublands (region ID 17). |
| 20. Sierras de Córdoba-Argentina | 2020 | Córdoba Wildland Fires Assessing Fire Risk Factors in Córdoba, Argentina using Earth Observations (Raines et al., 2024). | Yes                       | June, August and September in Tropical & Subtropical Grasslands, Savannas & Shrublands (region ID 53).   |

41

42

### 43 References

44 Athanasiou, M. and Xanthopoulos, G.: Fire behaviour of the large fires of 2007 in Greece, Proceedings of the 6th International  
45 Conference on Forest Fire Research, Coimbra, Portugal, 15-18,

46 Balch, J. K., Iglesias, V., Mahood, A. L., Cook, M. C., Amaral, C., DeCastro, A., Leyk, S., McIntosh, T. L., Nagy, R. C., and  
47 St. Denis, L.: The fastest-growing and most destructive fires in the US (2001 to 2020), *Science*, 386, 425-431,  
48 10.1126/science.adk5737, 2024.

49 Bitek, D. and Erenoğlu, R. C.: Forest Fire Analysis with Sentinel-2 Satellite Imagery: The Case of Mati (Greece) in 2018,  
50 *Academic Platform Journal of Natural Hazards and Disaster Management*, 3, 85-98, 10.52114/apjhad.1211651, 2022.

51 Cruz, M., Sullivan, A., Gould, J., Sims, N., Bannister, A., Hollis, J., and Hurley, R.: Anatomy of a catastrophic wildfire: the  
52 Black Saturday Kilmore East fire in Victoria, Australia, *Forest Ecology and Management*, 284, 269-285,  
53 10.1016/j.foreco.2012.02.035, 2012.

54 De la Barrera, F., Barraza, F., Favier, P., Ruiz, V., and Quense, J.: Megafires in Chile 2017: Monitoring multiscale  
55 environmental impacts of burned ecosystems, *Science of the total environment*, 637, 1526-1536,  
56 10.1016/j.scitotenv.2018.05.119, 2018.

57 Desyatkin, A., Okoneshnikova, M., Fedorov, P., Ivanova, A., Filippov, N., and Desyatkin, R.: The Impact of catastrophic  
58 forest fires of 2021 on the light soils in Central Yakutia, *Land*, 13, 1130, 10.3390/land13081130, 2024.

59 Dong, X., Li, F., Lin, Z., Harrison, S. P., Chen, Y., and Kug, J.-S.: Climate influence on the 2019 fires in Amazonia, *Science  
60 of the Total Environment*, 794, 148718, 10.1016/j.scitotenv.2021.148718, 2021.

61 Huang, S., Siegert, F., Goldammer, J., and Sukhinin, A.: Satellite-derived 2003 wildfires in southern Siberia and their potential  
62 influence on carbon sequestration, *International Journal of Remote Sensing*, 30, 1479-1492, 10.1080/01431160802541549,  
63 2009.

64 Kirchmeier-Young, M. C., Gillett, N. P., Zwiers, F. W., Cannon, A. J., and Anslow, F.: Attribution of the influence of human-  
65 induced climate change on an extreme fire season, *Earth's Future*, 7, 2-10, 10.1029/2018EF001050, 2019.

66 Kochtubajda, B., Stewart, R. E., Flannigan, M. D., Bonsal, B. R., Cuell, C., and Mooney, C. J.: An assessment of surface and  
67 atmospheric conditions associated with the extreme 2014 wildfire season in Canada's Northwest Territories, *Atmosphere-  
68 Ocean*, 57, 73-90, 10.1080/07055900.2019.1576023, 2019.

69 Lohberger, S., Stängel, M., Atwood, E. C., and Siegert, F.: Spatial evaluation of Indonesia's 2015 fire-affected area and  
70 estimated carbon emissions using Sentinel-1, *Global change biology*, 24, 644-654, 10.1111/gcb.13841, 2018.

71 Nolan, R. H., Bowman, D. M., Clarke, H., Haynes, K., Ooi, M. K., Price, O. F., Williamson, G. J., Whittaker, J., Bedward,  
72 M., and Boer, M. M.: What do the Australian Black Summer fires signify for the global fire crisis?, *Fire*, 4, 97,  
73 10.3390/fire4040097, 2021.

74 Pascual, A. and Guerra-Hernández, J.: An integrated assessment of carbon emissions from forest fires beyond impacts on  
75 aboveground biomass. A showcase using airborne lidar and GEDI data over a megafire in Spain, *Journal of Environmental  
76 Management*, 345, 118709, 10.1016/j.jenvman.2023.118709, 2023.

77 Pinto, P., Silva, Á. P., Viegas, D. X., Almeida, M., Raposo, J., and Ribeiro, L. M.: Influence of convectively driven flows in  
78 the course of a large fire in Portugal: the case of Pedrógão Grande, *Atmosphere*, 13, 414, 10.3390/atmos13030414, 2022.

79 Raines, C., Kaster, B., Ruan, Y.-Y., and Bhole, N.: Córdoba Wildland Fires: Assessing Fire Risk Factors in Córdoba, Argentina  
80 using Earth Observations, 2024.

81 Shulski, M., Wendler, G., Alden, S., and Larkin, N.: 1.5 Alaska's exceptional 2004 fire season, *Sixth Symposium on Fire and  
82 Forest Meteorology*,

83 Tedim, F., Remelgado, R., Borges, C., Carvalho, S., and Martins, J.: Exploring the occurrence of mega-fires in Portugal, *Forest  
84 Ecology and Management*, 294, 86-96, 10.1016/j.foreco.2012.07.031, 2013.

85 Varga, K., Jones, C., Trugman, A., Carvalho, L. M., McLoughlin, N., Seto, D., Thompson, C., and Daum, K.: Megafires in a  
86 warming world: What wildfire risk factors led to California's largest recorded wildfire, *Fire*, 5, 16, /10.3390/fire5010016,  
87 2022.

88
